# Supplementary material
Source: PubMed Central journal article supplement (PMC3810808)
Supplement: tjp0591-5047-SD1.pdf [file tjp0591-5047-SD1.pdf]

## Supplemental table 1.

Table S1. Western Blot Details

| Antibody                     | Manufacture     | Catalog nr. | Sample heating | Protein loading amount | Gel type | Electrophoresis run time | Predicted molecular weight | Blotting time | Blocking agent | Antibody concentration | Secondary antibody | Secondary antibody concentration |
|------------------------------|-----------------|-------------|----------------|------------------------|----------|--------------------------|----------------------------|---------------|----------------|------------------------|--------------------|----------------------------------|
| CAT                          | abcam           | ab1877      | 96 °           | 5 µg                   | 10%      | 90 min                   | 59 kD                      | 120min        | 5% Milk        | 1:5000                 | Rabbit             | 1:5.000                          |
| COX-1                        | abcam           | ab53766     | 96 °           | 12 µg                  | 10%      | 80 min                   | 69 kD                      | 90min         | 3% BSA         | 1:500                  | Rabbit             | 1:5.000                          |
| COX-2                        | abcam           | ab52237     | 96 °           | 12 µg                  | 10%      | 80 min                   | 69 kD                      | 90min         | 2% Milk        | 1:500                  | Rabbit             | 1:5.000                          |
| Endothelin receptor A        | Nordicbiosite   | D424        | 96 °           | 12 µg                  | 10%      | 90 min                   | 50 kD                      | 90min         | 2% Milk        | 1:3000                 | Rabbit             | 1:5.000                          |
| Endothelin receptor B        | Santa Cruz      | sc-21197    | NH             | 20 µg                  | 10%      | 90 min                   | 50 kD                      | 90min         | 5% Milk        | 1:200                  | Goat               | 1:5.000                          |
| Endothelin-1                 | abcam           | ab88093     | 96 °           | 12 µg                  | 16.5%    | 150 min                  | 24 kD                      | 90min         | 3% BSA         | 1:1000                 | Mouse              | 1:5.000                          |
| eNOS                         | BD Transduction | 612665      | 96 °           | 16 µg                  | 10%      | 90 min                   | 140 kD                     | 120min        | 2% Milk        | 1:200                  | Mouse              | 1:5.000                          |
| eNOS P-Ser <sup>1177</sup>   | Calbiochem      | 574597      | NH             | 20 µg                  | 10%      | 90 min                   | 140 kD                     | 120min        | 3% BSA         | 1:50                   | Mouse              | 1:5.000                          |
| GAPDH                        | abcam           | ab22604     | -              | -                      | -        | -                        | 36 kD                      | 90min         | 5% Milk        | 1:16.000               | Mouse              | 1:5.000                          |
| GPX1                         | abcam           | ab22604     | 96 °           | 16 µg                  | 16.5%    | 120 min                  | 22 kD                      | 120min        | 5% Milk        | 1:1000                 | Rabbit             | 1:5.000                          |
| NADPH oxidase <sup>p67</sup> | BD Transduction | 610912      | NH             | 16 µg                  | 10%      | 90 min                   | 67 kD                      | 90min         | 3% BSA         | 1:500                  | Mouse              | 1:5.000                          |
| nNOS                         | BD Transduction | 610309      | NH             | 10 µg                  | 10%      | 90 min                   | 155 kD                     | 120min        | 5% Milk        | 1:10 000               | Mouse              | 1:5.000                          |
| PGI <sub>2</sub> synthase    | Santa Cruz      | sc-20933    | NH             | 10 µg                  | 10%      | 90 min                   | 52 kD                      | 90min         | 2% Milk        | 1:200                  | Rabbit             | 1:5.000                          |
| SOD1                         | Calbiochem      | 574597      | NH             | 1 µg                   | 16.5%    | 120 min                  | 18 kD                      | 120min        | 3% BSA         | 1:1000                 | Sheep              | 1:5.000                          |
| SOD2                         | Calbiochem      | AB10346     | 96 °           | 1 µg                   | 16.5%    | 120 min                  | 25 kD                      | 120min        | 2% Milk        | 1:5000                 | Rabbit             | 1:10.000                         |
| TBX                          | abcam           | ab39362     | 96 °           | 10 µg                  | 16.5%    | 90 min                   | 54 kD                      | 120min        | 5% Milk        | 1:250                  | Rabbit             | 1:5.000                          |

## Supplemental table 2.

**Table S2. Performance Test**

|                                                                        | Placebo n = 13 |             | Resveratrol n = 14 |              |
|------------------------------------------------------------------------|----------------|-------------|--------------------|--------------|
|                                                                        | <i>Pre</i>     | <i>Post</i> | <i>Pre</i>         | <i>Post</i>  |
| Step test (est. ml O <sub>2</sub> min <sup>-1</sup> kg <sup>-1</sup> ) | 28.3 ± 0.9     | 31.9 ± 1.6* | 29.3 ± 1.0         | 36.0 ± 1.2*# |
| Chair stand (Count per 30s)                                            | 15.7 ± 0.9     | 22.7 ± 1.5* | 17.9 ± 1.0         | 24.4 ± 1.4*  |
| Up & Go (s)                                                            | 3.6 ± 0.1      | 3.1 ± 0.1*  | 3.5 ± 0.1          | 3.3 ± 0.1    |
| Balance open (s)                                                       | 35.3 ± 3.7     | 38.4 ± 3.2  | 34.5 ± 3.9         | 38.8 ± 3.7   |
| Balance closed (s)                                                     | 7.2 ± 1.5      | 6.9 ± 0.9   | 8.2 ± 2.8          | 8.2 ± 1.8    |
| 5k-walk (min)                                                          | 54 ± 2         | 49 ± 2*     | 56 ± 2             | 49 ± 3*      |

Data are presented as mean ± SEM. \* denotes significantly different from pre, # denotes significantly different from placebo (P < 0.05).
